# Supplementary material for: Theoretical investigation of the broad one-photon absorption line-shape of a flexible symmetric carbazole derivative
Source: Royal Society of Chemistry journal article supplement (doi:10.1039/c6cp04162k), 2016-01-01
Supplement: c6cp04162k1.pdf [file c6cp04162k1.pdf]

**Supporting Information**

**Theoretical investigation of the broad one-photon absorption line-shape of a flexible  
symmetric carbazole derivative**

**Yanli Liu,<sup>a,b</sup> Javier Cerezo,<sup>b</sup> Fabrizio Santoro,<sup>\*b</sup> Antonio Rizzo,<sup>c</sup> Na Lin,<sup>\*a</sup> Xian Zhao<sup>\*a</sup>**

<sup>a</sup> *State Key Laboratory of Crystal Materials, Shandong University, 250100 Jinan, Shandong, PR China*

<sup>b</sup> *CNR – Consiglio Nazionale delle Ricerche, Istituto di Chimica dei Composti Organo Metallici (ICCOM-CNR), Sede Secondaria di Pisa, Area della Ricerca, via G. Moruzzi 1, I-56124 Pisa, Italy*

<sup>c</sup> *CNR – Consiglio Nazionale delle Ricerche, Istituto per i Processi Chimico Fisici (IPCF-CNR), Sede Secondaria di Pisa, Area della Ricerca, via G. Moruzzi 1, I-56124 Pisa, Italy.*

\* Corresponding authors: [fabrizio.santoro@iccom.cnr.it](mailto:fabrizio.santoro@iccom.cnr.it), [linnakth@gmail.com](mailto:linnakth@gmail.com), [xianzhao@sdu.edu.cn](mailto:xianzhao@sdu.edu.cn)

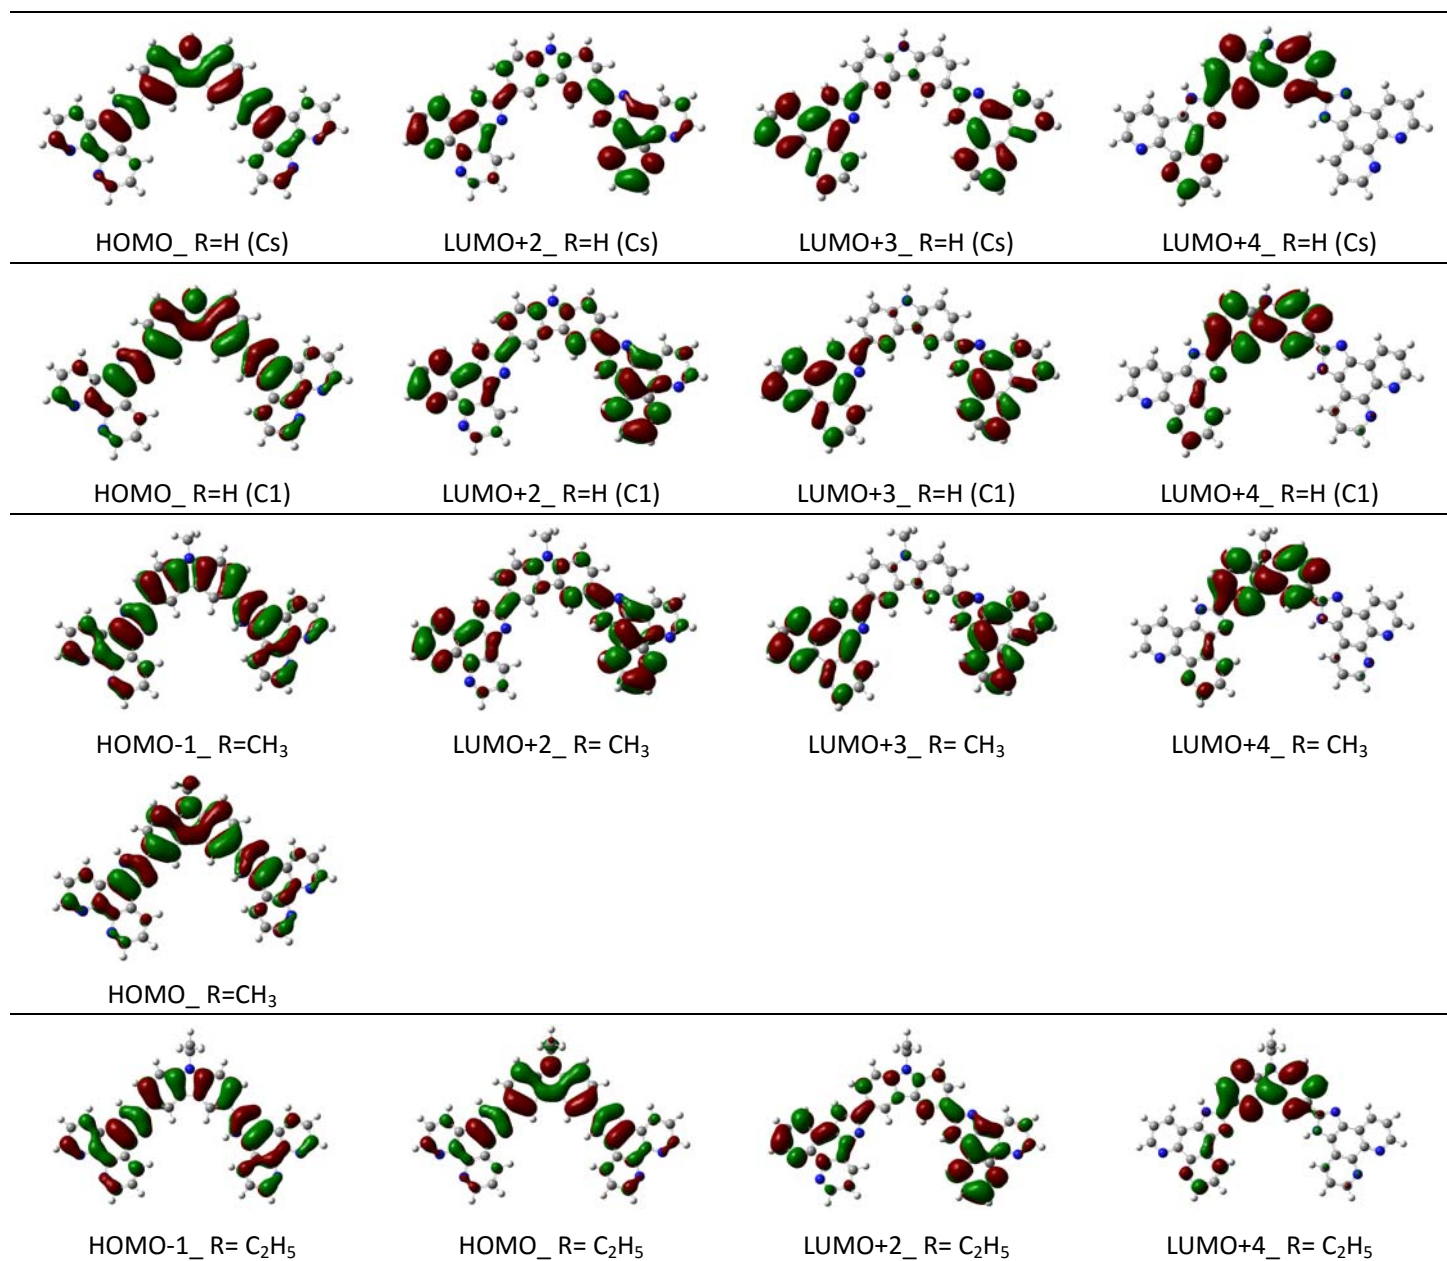

**Fig. S1** *R-POCP*. The corresponding molecular orbitals of derivatives with R changing from H to C<sub>2</sub>H<sub>5</sub>

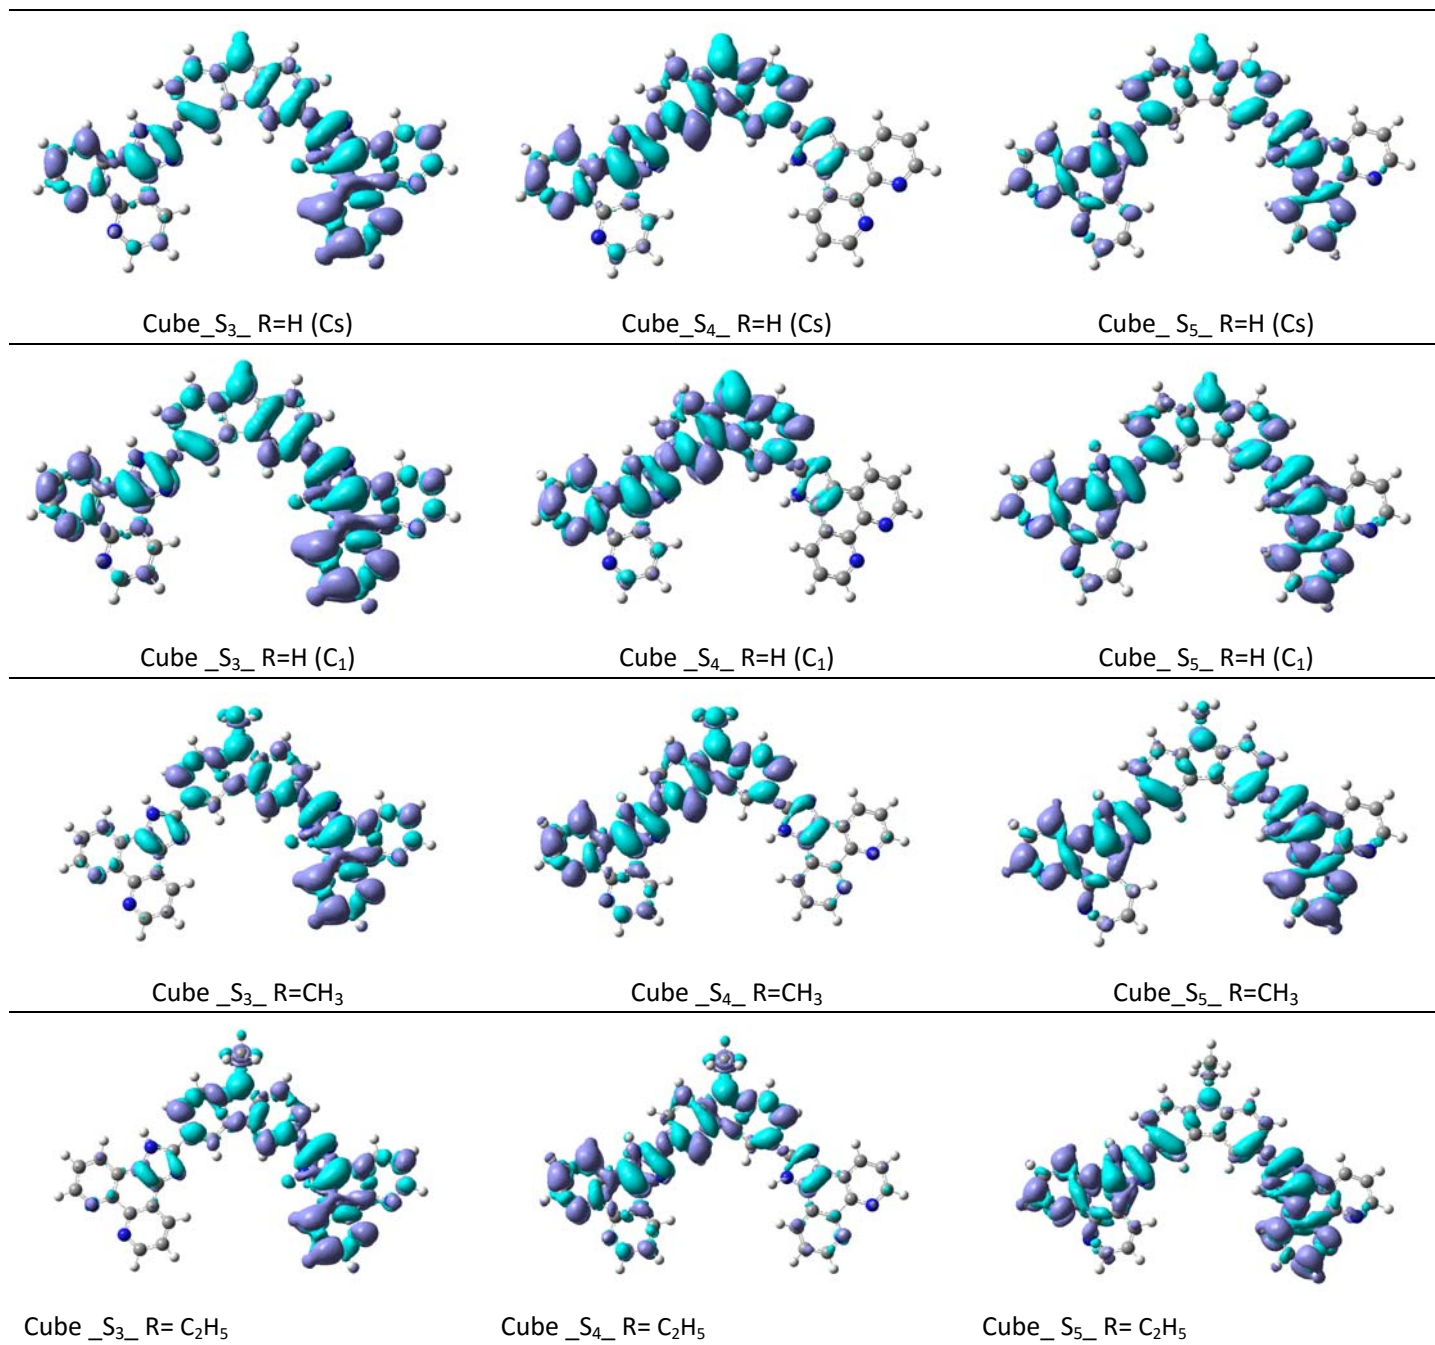

**Fig. S2** R-POCP. Difference between the electronic densities of  $S_3$ - $S_5$  and ground state of  $R=H$ ,  $CH_3$  and  $C_2H_5$

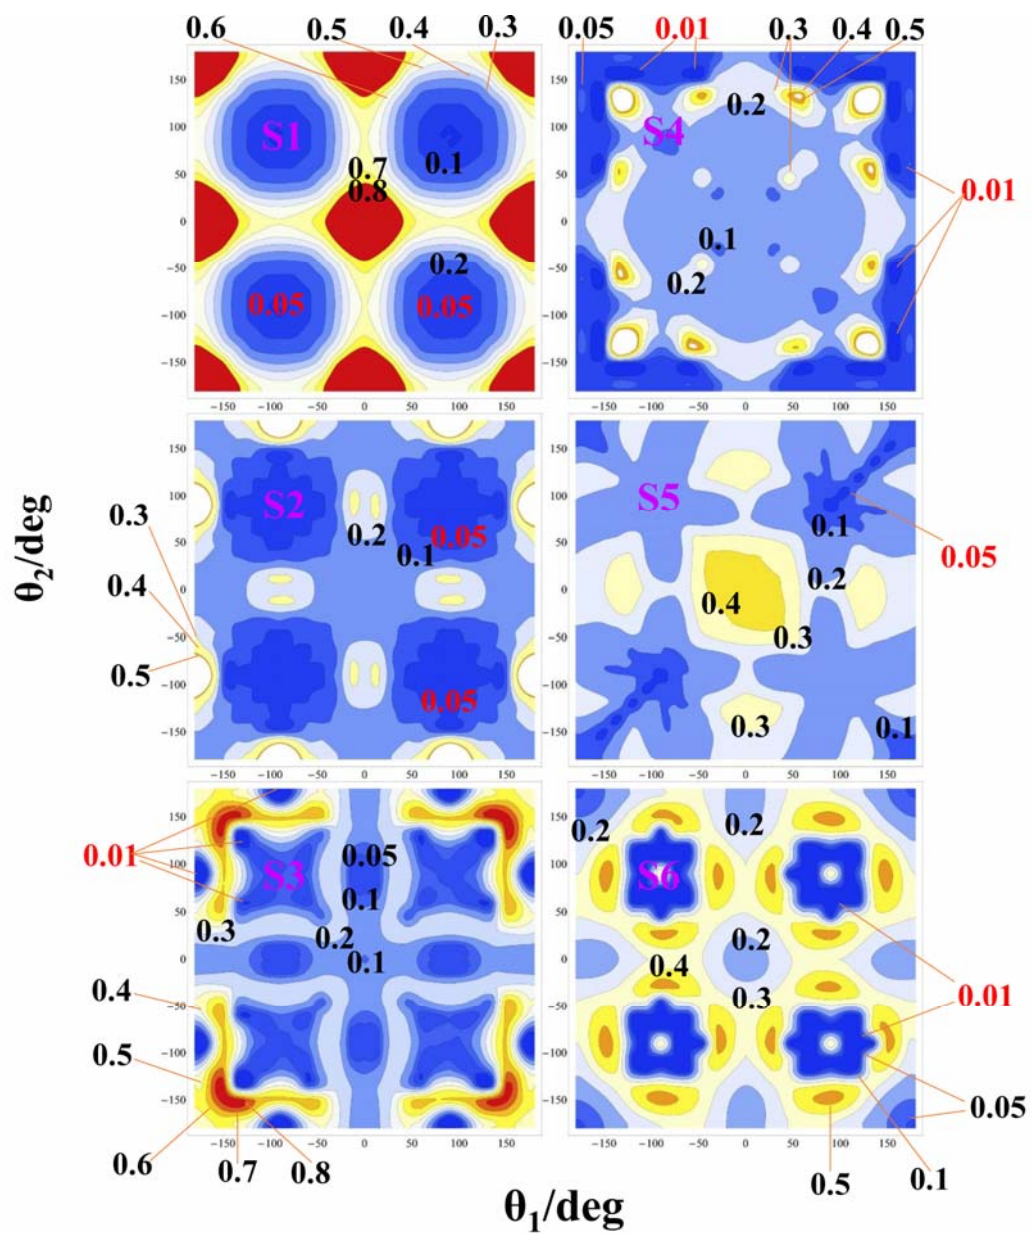

**Fig. S3** H-POCP. ES relaxed scan as a function of the dihedral angles  $\theta_1$  and  $\theta_2$ , the oscillator strengths of the minima structure of each excited states are highlighted in red

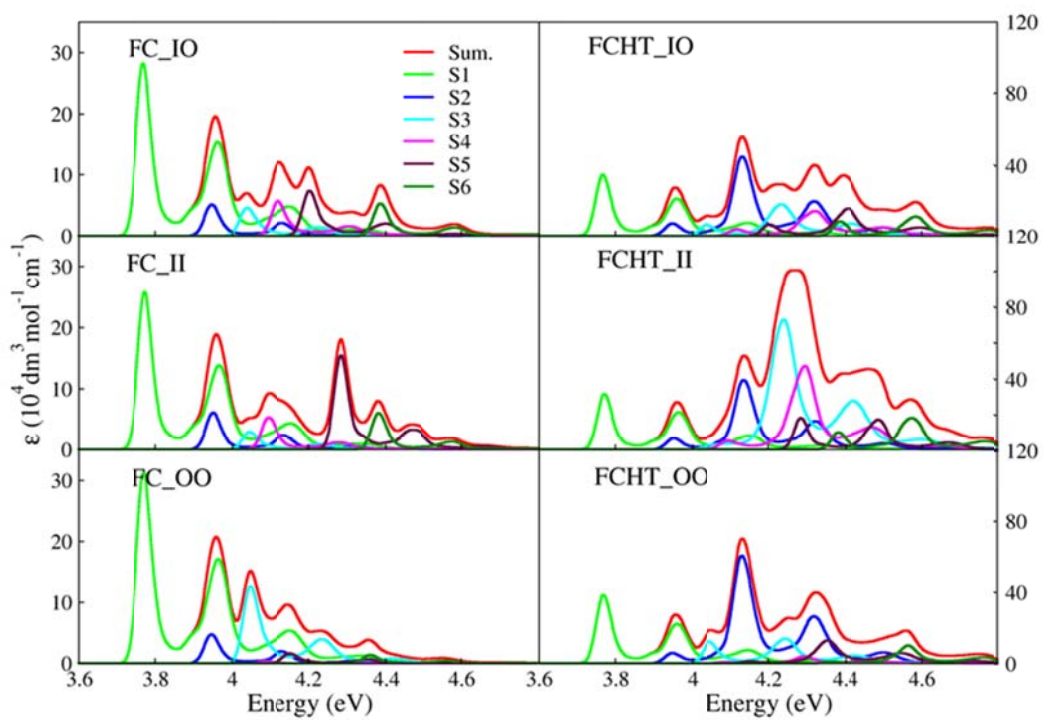

**Fig. S4** H-POCP. Vibronic spectra computed with the TD approach at 0K for the first six excited electronic states of H-POCP excited states considering only the 196 fast  $r$  coordinates. Spectra convoluted with a Gaussian with HWHM=0.02eV.



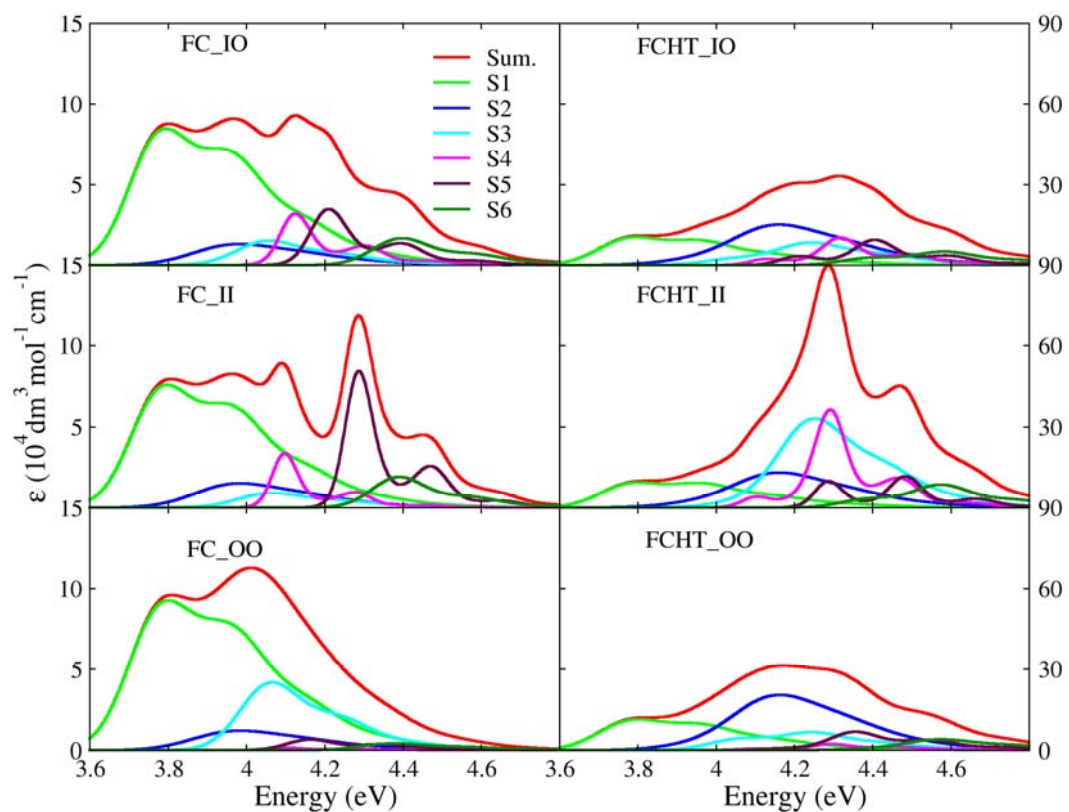

**Fig. S5** H-POCP. Vibronic spectra computed with the TD approach at 300K for the first six excited electronic states of H-POCP excited states considering only the 196 fast  $r$  coordinates. Spectra convoluted with a Gaussian representing the solvent inhomogeneous broadening specific for each state of each conformer and reported in Table 2

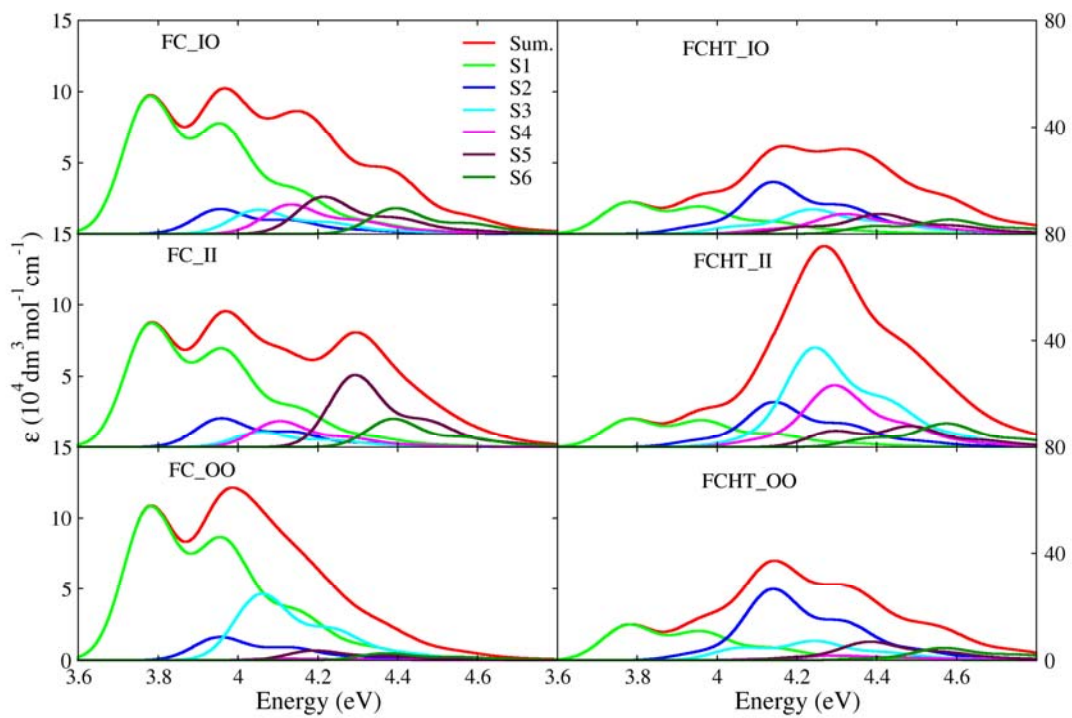

**Fig. S6** H-POCP. Vibronic spectra computed with the TD approach at 300K for the first six excited electronic states of H-POCP excited states considering only the 196 fast  $r$  coordinates. Spectra convoluted with a Gaussian averaged solvent inhomogeneous broadening with HWHM of 0.07eV

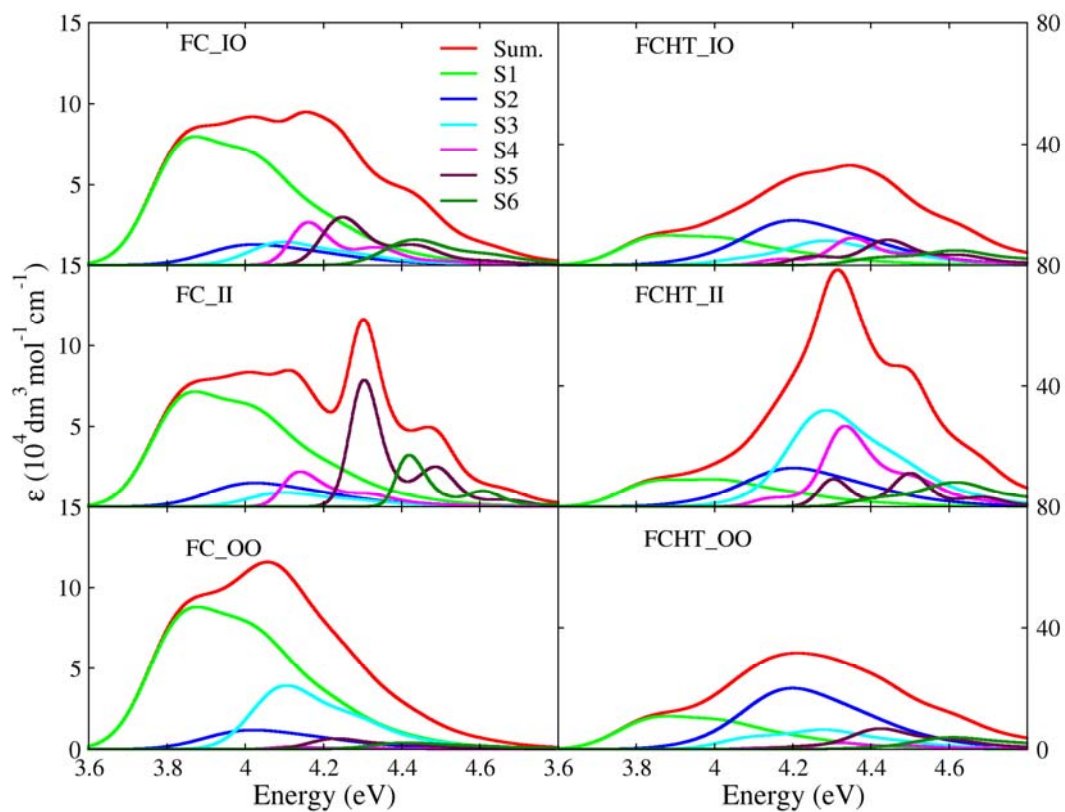

**Fig. S7** H-POCP. FC and FCHT spectra obtained convoluting 196\*FC/FCHT\* spectra with torsional broadening of six excited states of three conformers of H-POCP, calculated at 300K. Spectra convoluted with a Gaussian representing the solvent inhomogeneous broadening specific for each state of each conformer and reported in Table 2



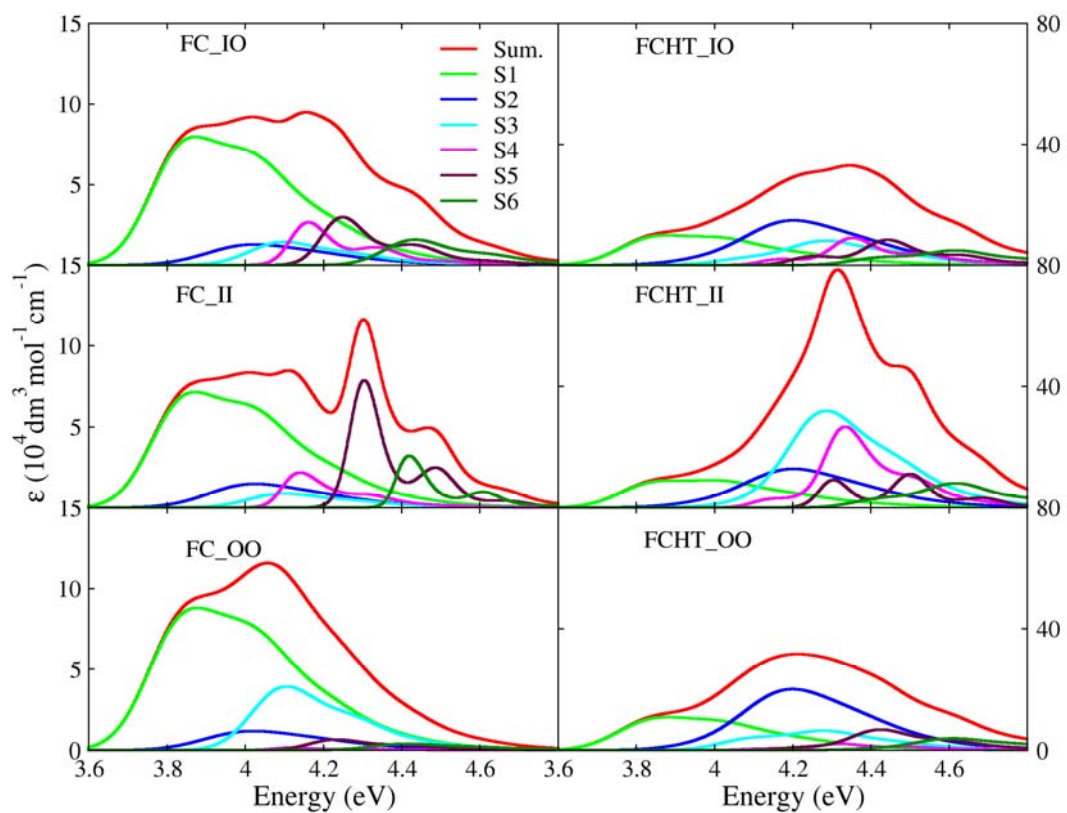

**Fig. S8** H-POCP. FC and FCHT spectra obtained convoluting 196\*FC/FCHT\* spectra with torsional broadening of  $S_1$ - $S_6$  of three conformers of H-POCP at 300K, convoluted with an averaged solvent broadening with HWHM of 0.07eV

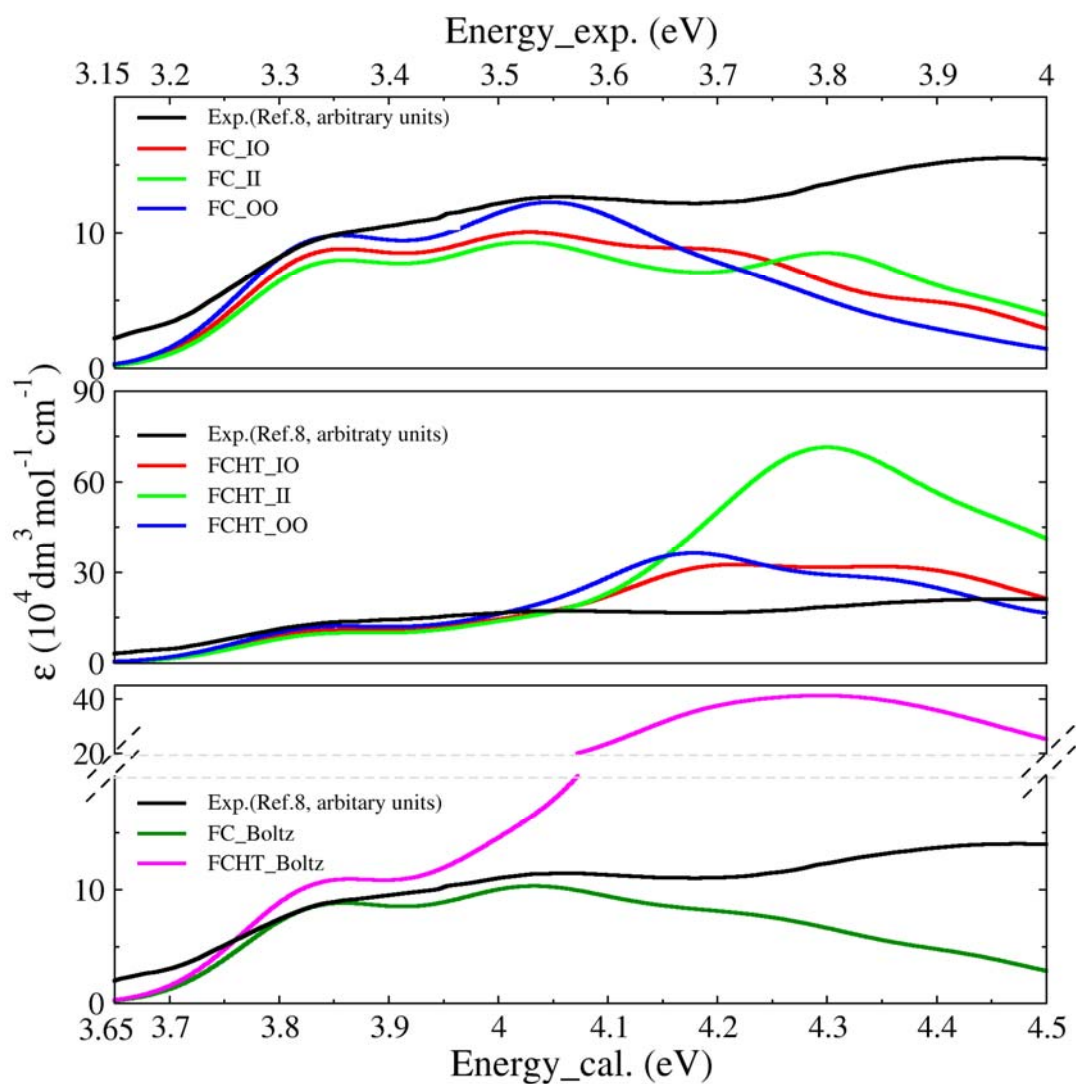

**Fig. S9** H-POCP. Comparison of the experimental spectrum of POCP with the total FC and FCHT spectra computed for H-POCP by convoluting the histograms of the torsional broadening with the vibronic spectra at 300K, convoluted with an averaged solvent broadening with HWHM of 0.07eV

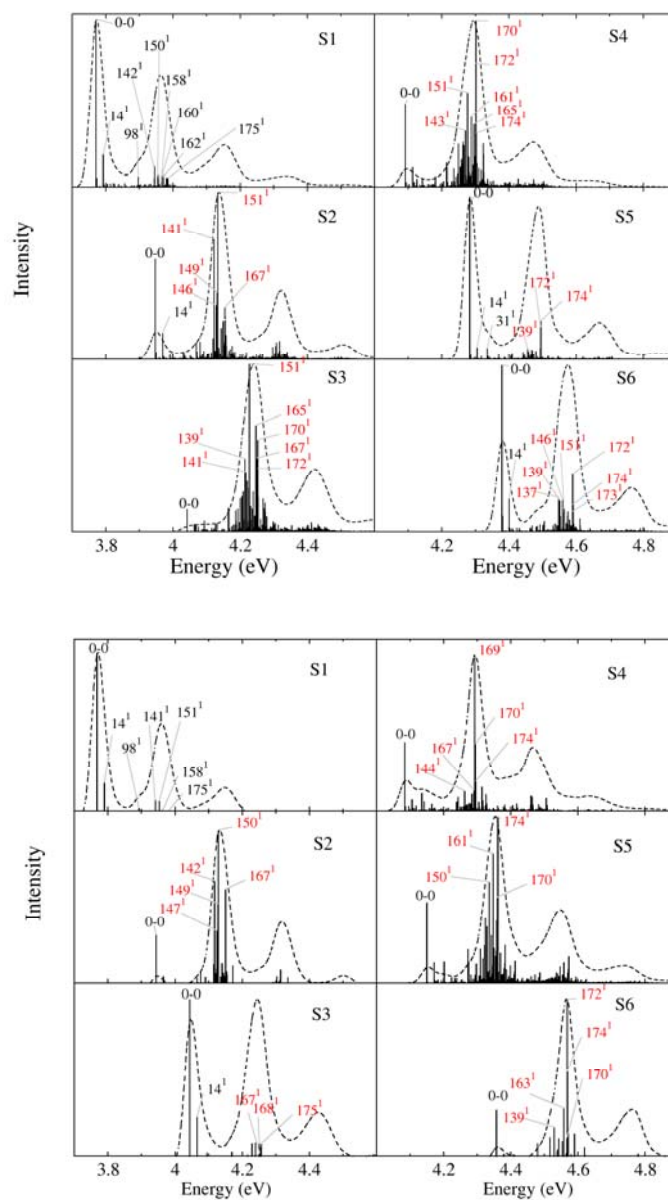

**Fig. S10** H-POCP. Assignments of the main stick bands of the FCHT spectra of the  $S_1$ - $S_6$  excited electronic states of conformers II (top) and OO (bottom). Vibrational contributions are labelled as " $n^x$ ", where  $x$  indicates the quanta deposited on the excited-state normal mode  $n$ . Modes contributing most to HT are highlighted in red. Spectra are convoluted with a Gaussian spectral shape function with a HWHM of 0.02 eV. The convergence of the TI calculations for all the conformers, measured as the percentage of the recovered total intensity is always above 99 % for FC spectra and above 97.9% for FC+HT spectra

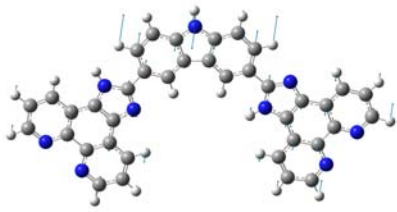

mode 14 (142.23  $\text{cm}^{-1}$ )

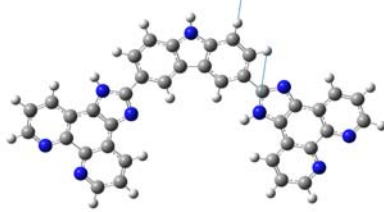

mode 98 (1000.61  $\text{cm}^{-1}$ )

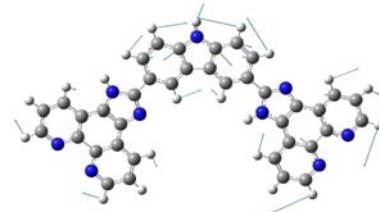

mode 137 (1352.39  $\text{cm}^{-1}$ )

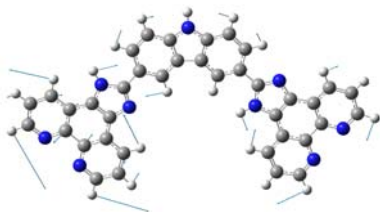

mode 138 (1354.38  $\text{cm}^{-1}$ )

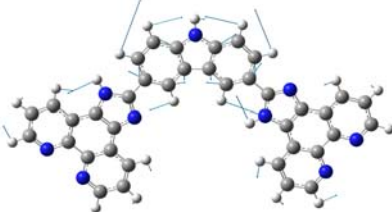

mode 140 (1380.5  $\text{cm}^{-1}$ )

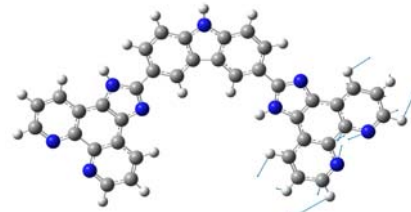

mode 141 (1389.80  $\text{cm}^{-1}$ )

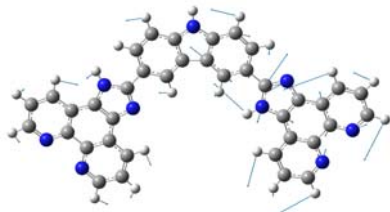

mode 146 (1450.25  $\text{cm}^{-1}$ )

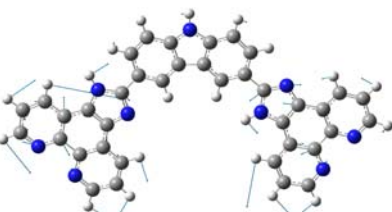

mode 148 (1459.57  $\text{cm}^{-1}$ )

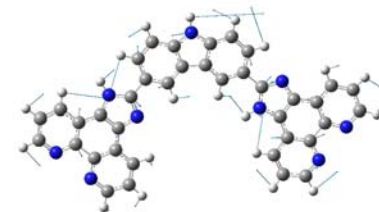

mode 149 (1461.82  $\text{cm}^{-1}$ )

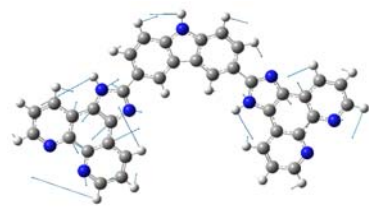

mode 151 (1538.02  $\text{cm}^{-1}$ )

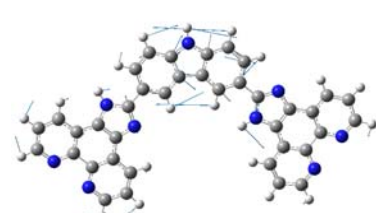

mode 158 (1538.02  $\text{cm}^{-1}$ )

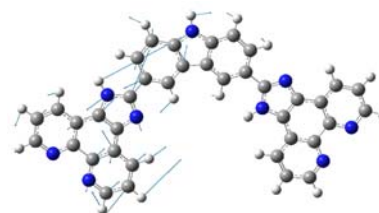

mode 164 (1617.33  $\text{cm}^{-1}$ )

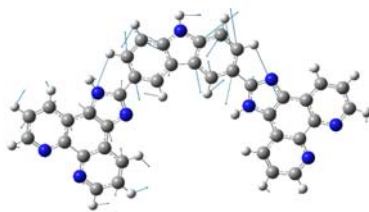

mode 168 (1662.10  $\text{cm}^{-1}$ )

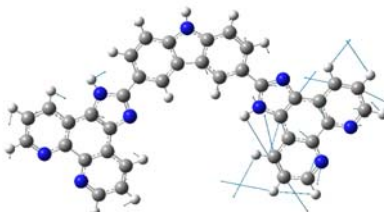

mode 170 (1671.31  $\text{cm}^{-1}$ )

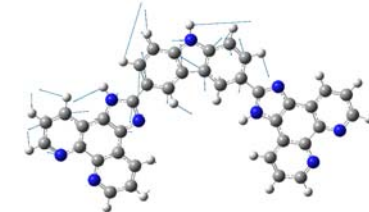

mode 171 (1678.30  $\text{cm}^{-1}$ )

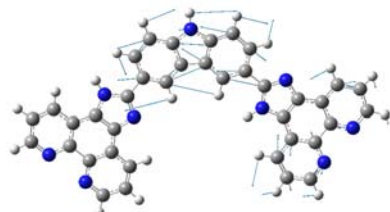

mode 172 (1696.00  $\text{cm}^{-1}$ )

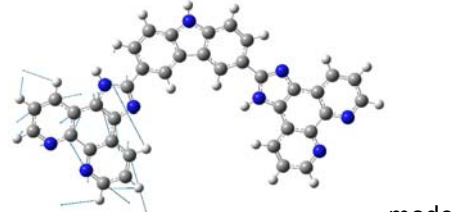

mode 173 (1699.54  $\text{cm}^{-1}$ )

mode

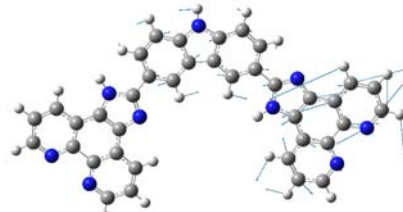

mode 174 (1699.54  $\text{cm}^{-1}$ )

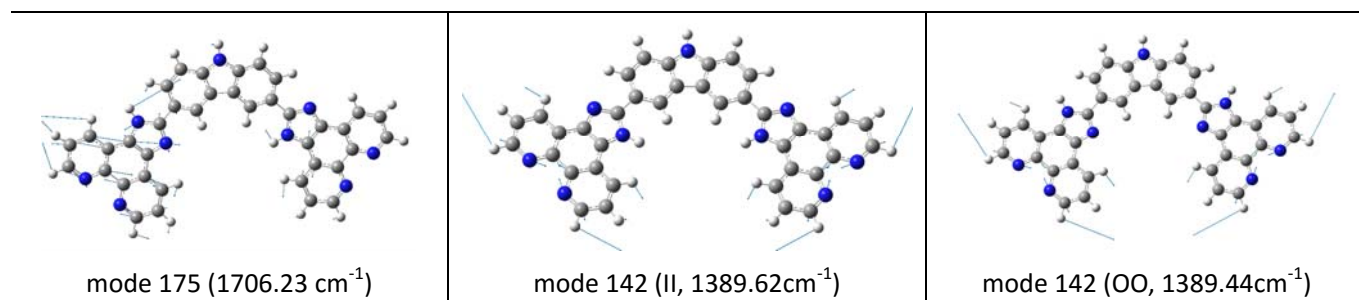

**Fig. S11** H-POCP. Selected vibrational modes in Figure11, calculated for the ground electronic state at the CAMB3LYP/PCM/6-31G(d,p) level in DMF of IO conformer, frequencies are reported in parenthesis



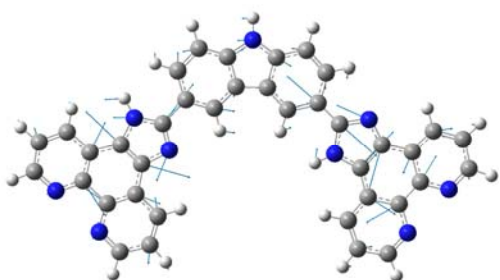

mode 1 (IO\_S<sub>1</sub>, 1846i)

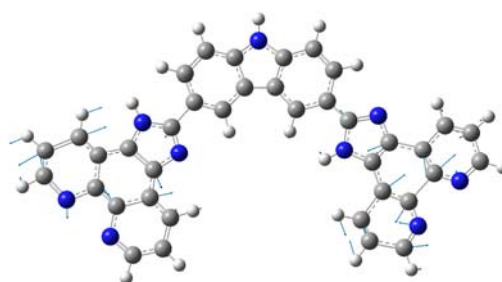

mode 1 (IO\_S<sub>2</sub>, 1051i)

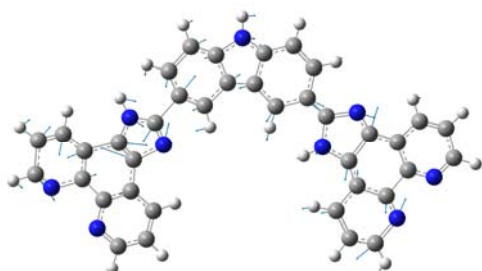

mode 1 (IO\_S<sub>3</sub>, 1119i)

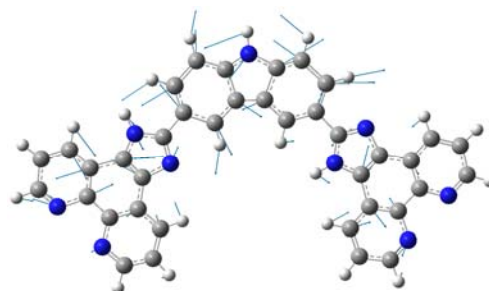

mode 1 (IO\_S<sub>4</sub>, 671i)

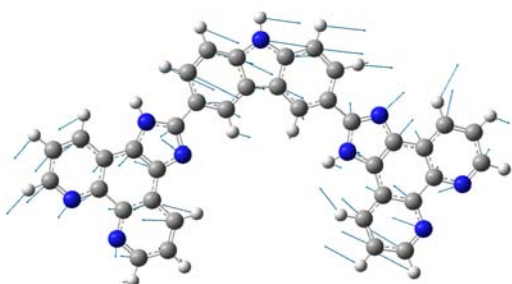

mode 1 (IO\_S<sub>6</sub>, 48i)

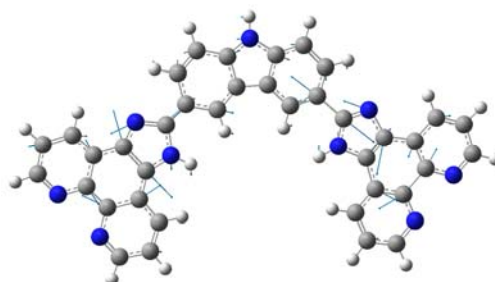

mode 1 (II\_S<sub>1</sub>, 1985i)

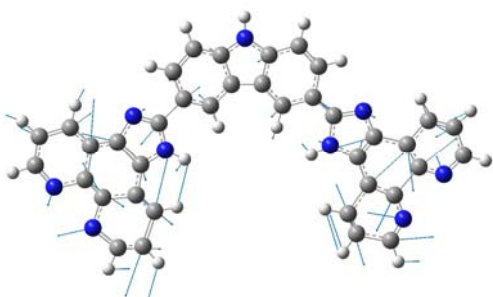

mode 1 (II\_S<sub>2</sub>, 941i)

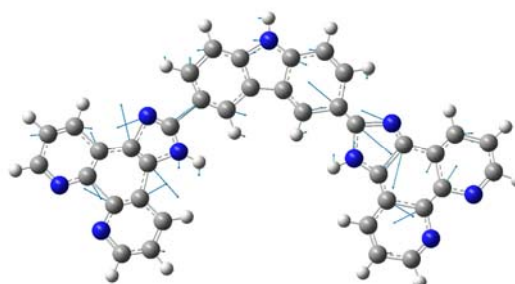

mode 1 (II\_S<sub>3</sub>, 3513i)

---

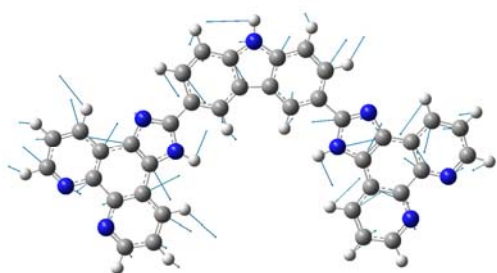

mode 1 (II\_S<sub>5</sub>, 454i)

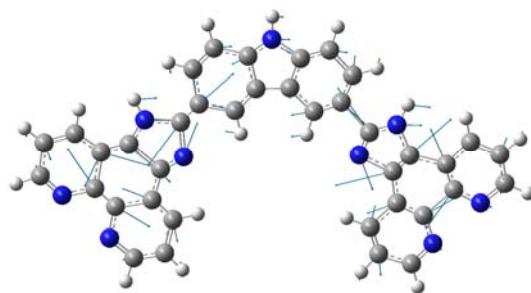

mode 1 (OO\_S<sub>1</sub>, 1840i)

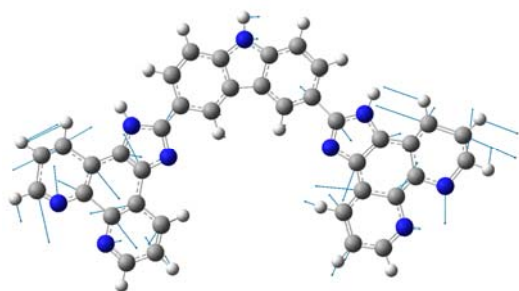

mode 1 (OO\_S<sub>2</sub>, 960i)

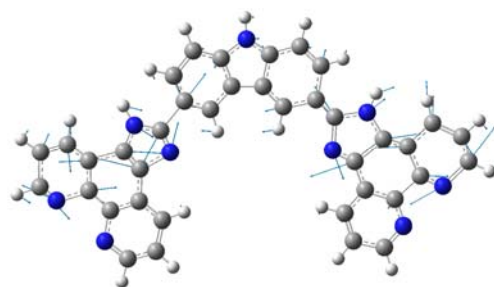

mode 1 (OO\_S<sub>3</sub>, 1260i)

---

**Fig. S12** H-POCP. Selected vibrational modes highlighted in Table 3, calculated for the excited state at the ground state geometry at the CAMB3LYP/PCM/6-31G(d,p) level in DMF, frequencies are reported in parenthesis

**Table S1:** R-POCP N3-C5-C6-C7 ( $\theta_1$ , degree) and N4-C8-C9-C10 ( $\theta_2$ , degree) dihedral angles (See labels in Figure 1), oscillator strengths ( $\delta_{OPA}$ , au), as well as transition energies (reported in parenthesis, eV) for the first ten excited states of carbazole analogues with R varying from H to C<sub>8</sub>H<sub>17</sub>, optimized at CAM-B3LYP/6-31G (d,p), in DMF.

| R                                                            | $\theta_1$ | $\theta_2$ | S <sub>1</sub> | S <sub>2</sub> | S <sub>3</sub> | S <sub>4</sub> | S <sub>5</sub> | S <sub>6</sub> | S <sub>7</sub> | S <sub>8</sub> | S <sub>9</sub> | S <sub>10</sub> |
|--------------------------------------------------------------|------------|------------|----------------|----------------|----------------|----------------|----------------|----------------|----------------|----------------|----------------|-----------------|
| H-Cs                                                         | -180       | 0          | 1.24<br>(3.92) | 0.17<br>(4.05) | 0.16<br>(4.13) | 0.19<br>(4.21) | 0.23<br>(4.29) | 0.15<br>(4.47) | 0.57<br>(4.64) | 0.00<br>(4.65) | 0.00<br>(4.65) | 0.62<br>(4.69)  |
| H-C <sub>1</sub>                                             | -167.3     | 166.9      | 1.16<br>(3.95) | 0.15<br>(4.06) | 0.19<br>(4.15) | 0.19<br>(4.22) | 0.23<br>(4.30) | 0.18<br>(4.48) | 0.59<br>(4.65) | 0.00<br>(4.65) | 0.00<br>(4.65) | 0.64<br>(4.72)  |
| CH <sub>3</sub>                                              | -167.3     | 167.0      | 1.23<br>(3.92) | 0.16<br>(4.05) | 0.04<br>(4.12) | 0.22<br>(4.17) | 0.33<br>(4.28) | 0.11<br>(4.46) | 0.67<br>(4.64) | 0.00<br>(4.65) | 0.00<br>(4.65) | 0.68<br>(4.69)  |
| C <sub>2</sub> H <sub>5</sub>                                | -167.9     | 168.4      | 1.24<br>(3.91) | 0.17<br>(4.05) | 0.03<br>(4.11) | 0.22<br>(4.16) | 0.35<br>(4.28) | 0.11<br>(4.46) | 0.66<br>(4.63) | 0.00<br>(4.65) | 0.00<br>(4.65) | 0.7<br>(4.69)   |
| C <sub>2</sub> H <sub>5</sub> <sub>planar</sub> <sup>a</sup> | 180        | 180        | 1.29<br>(3.89) | 0.19<br>(4.04) | 0.02<br>(4.10) | 0.19<br>(4.15) | 0.36<br>(4.27) | 0.10<br>(4.45) | 0.08<br>(4.62) | 0.00<br>(4.65) | 0.00<br>(4.65) | 0.68<br>(4.67)  |
| C <sub>3</sub> H <sub>7</sub>                                | -169.3     | 169.8      | 1.25<br>(3.91) | 0.18<br>(4.05) | 0.02<br>(4.11) | 0.22<br>(4.16) | 0.36<br>(4.27) | 0.1<br>(4.45)  | 0.66<br>(4.62) | 0.00<br>(4.65) | 0.00<br>(4.65) | 0.71<br>(4.68)  |
| C <sub>4</sub> H <sub>9</sub>                                | -171.4     | 172.0      | 1.27<br>(3.90) | 0.18<br>(4.04) | 0.02<br>(4.11) | 0.21<br>(4.16) | 0.36<br>(4.27) | 0.1<br>(4.45)  | 0.65<br>(4.62) | 0.00<br>(4.65) | 0.00<br>(4.65) | 0.71<br>(4.67)  |
| C <sub>5</sub> H <sub>11</sub>                               | -172.5     | 173.5      | 1.27<br>(3.90) | 0.19<br>(4.04) | 0.02<br>(4.10) | 0.20<br>(4.15) | 0.37<br>(4.27) | 0.1<br>(4.45)  | 0.65<br>(4.62) | 0.00<br>(4.65) | 0.00<br>(4.65) | 0.71<br>(4.67)  |
| C <sub>6</sub> H <sub>13</sub>                               | -166.2     | -177.63    | 1.25<br>(3.90) | 0.18<br>(4.05) | 0.02<br>(4.11) | 0.22<br>(4.16) | 0.39<br>(4.27) | 0.09<br>(4.45) | 0.67<br>(4.63) | 0.00<br>(4.65) | 0.00<br>(4.65) | 0.72<br>(4.68)  |
| C <sub>7</sub> H <sub>15</sub>                               | -166.6     | -176.3     | 1.25<br>(3.90) | 0.18<br>(4.05) | 0.02<br>(4.11) | 0.22<br>(4.16) | 0.39<br>(4.27) | 0.09<br>(4.45) | 0.67<br>(4.62) | 0.00<br>(4.65) | 0.00<br>(4.65) | 0.73<br>(4.68)  |
| C <sub>8</sub> H <sub>17</sub>                               | -164.3     | -174.8     | 1.24<br>(3.91) | 0.18<br>(4.05) | 0.02<br>(4.11) | 0.23<br>(4.16) | 0.39<br>(4.28) | 0.09<br>(4.45) | 0.68<br>(4.63) | 0.00<br>(4.65) | 0.00<br>(4.65) | 0.73<br>(4.68)  |
| C <sub>8</sub> H <sub>17</sub> <sub>inter</sub> <sup>b</sup> | -162.3     | -161.7     | 1.16<br>(3.95) | 0.16<br>(4.06) | 0.03<br>(4.12) | 0.27<br>(4.18) | 0.35<br>(4.29) | 0.11<br>(4.47) | 0.68<br>(4.64) | 0.00<br>(4.65) | 0.00<br>(4.65) | 0.75<br>(4.71)  |

**a:** is a planar Transition State of C<sub>2</sub>H<sub>5</sub> with a planar geometry

**b:** is optimized with a conformation whose tail of the octane interacts with the pi rings

**Table S2:** R-POCP. Transition natures of the redistributed state  $S_3$ - $S_5$  with R changing from H to  $C_2H_5$ , the corresponding transition Coefficient and energies (in eV) reported in parenthesis

| States | R=H (IO, Cs)                                                                   | R=H ( $C_1$ )                                                                  | R= $CH_3$                                                                           | R= $C_2H_5$                                                                        |
|--------|--------------------------------------------------------------------------------|--------------------------------------------------------------------------------|-------------------------------------------------------------------------------------|------------------------------------------------------------------------------------|
| $S_3$  | $H^a \rightarrow L^b + 2$ (0.47, 4.13 eV)                                      | $H \rightarrow L + 2$ (0.47, 4.15 eV)                                          | $H \rightarrow L + 2$ (0.40, 4.12 eV)                                               | $H \rightarrow L + 2$ (0.38, 4.11 eV)<br>$H \rightarrow L + 4$ (0.31, 4.11 eV)     |
| $S_4$  | $H \rightarrow L + 4$ (0.43, 4.21 eV)                                          | $H \rightarrow L + 4$ (0.45, 4.22 eV)                                          | $H \rightarrow L + 4$ (0.46, 4.17 eV)                                               | $H \rightarrow L + 4$ (0.44, 4.16 eV)                                              |
| $S_5$  | $H \rightarrow L + 3$ (0.35, 4.30 eV)<br>$H \rightarrow L + 4$ (0.34, 4.30 eV) | $H \rightarrow L + 3$ (0.36, 4.30 eV)<br>$H \rightarrow L + 4$ (0.34, 4.30 eV) | $H - 1 \rightarrow L + 2$ (-0.36, 4.28 eV)<br>$H \rightarrow L + 3$ (0.42, 4.28 eV) | $H - 1 \rightarrow L + 2$ (0.37, 4.28 eV)<br>$H \rightarrow L + 4$ (0.42, 4.28 eV) |

**a:** the highest occupied molecular orbital (HOMO);

**b:** the lowest unoccupied molecular orbital (LUMO)

**Table S3:** Et-POCP. Excitation energies  $E_{gf}$  (eV), oscillator strengths  $\delta_{OPA}$  (au) for one-photon absorption, and dominating transition nature for the first 10 lowest excited states of Et-POCP in DMF obtained at CAMB3LYP/6-31G(d,p) level at the geometry optimized at CAMB3LYP/6-31G(d,p) level

| State           | $E_{gf}$ | $\delta_{OPA}$ | Transition | Coefficient |
|-----------------|----------|----------------|------------|-------------|
| S <sub>1</sub>  | 3.91     | 1.24           | H→L        | 0.50        |
| S <sub>2</sub>  | 4.05     | 0.17           | H-1→L      | 0.41        |
|                 |          |                | H→L+1      | 0.44        |
| S <sub>3</sub>  | 4.11     | 0.03           | H-1→L+2    | 0.31        |
|                 |          |                | H→L+4      | 0.38        |
| S <sub>4</sub>  | 4.16     | 0.22           | H→L+4      | 0.44        |
| S <sub>5</sub>  | 4.28     | 0.35           | H-1→+2     | -0.37       |
|                 |          |                | H→L+3      | 0.42        |
| S <sub>6</sub>  | 4.46     | 0.11           | H-1→L+3    | 0.31        |
|                 |          |                | H→L+5      | 0.43        |
| S <sub>7</sub>  | 4.63     | 0.66           | H-1→L+4    | 0.48        |
| S <sub>8</sub>  | 4.65     | 0.00           | H-1→L+5    | 0.42        |
|                 |          |                | H→L+6      | -0.35       |
| S <sub>9</sub>  | 4.65     | 0.00           | H-7→L      | 0.38        |
|                 |          |                | H-7→L+1    | 0.45        |
| S <sub>10</sub> | 4.69     | 0.70           | H-→L+5     | 0.38        |
|                 |          |                | H→L+6      | 0.44        |



**Table S4:** H-POCP. Excitation energies  $E_{gf}$  (eV) with the symmetric reported in parenthesis, oscillator strength  $\delta_{OPA}$  (au) and square of transition dipole moments ( $\mu^2$ ) of the first ten excited states, obtained at CAM-B3LYP/6-31G(d,p) level in DMF for the three conformers of H-POCP

| Ev              | II        | IO        | OO        |
|-----------------|-----------|-----------|-----------|
| S <sub>1</sub>  | 3.93 (B2) | 3.92 (A') | 3.92 (B2) |
| S <sub>2</sub>  | 4.05 (A1) | 4.05 (A') | 4.05 (A1) |
| S <sub>3</sub>  | 4.14 (B2) | 4.13 (A') | 4.14 (B2) |
| S <sub>4</sub>  | 4.17 (A1) | 4.21 (A') | 4.20(A1)  |
| S <sub>5</sub>  | 4.36 (A1) | 4.29 (A') | 4.27 (A1) |
| S <sub>6</sub>  | 4.45 (B2) | 4.47 (A') | 4.45 (B2) |
| S <sub>7</sub>  | 4.62 (B2) | 4.64 (A') | 4.65 (A2) |
| S <sub>8</sub>  | 4.65 (A2) | 4.65 (A') | 4.65 (B1) |
| S <sub>9</sub>  | 4.65 (B1) | 4.65 (A') | 4.68 (B2) |
| S <sub>10</sub> | 4.69 (A1) | 4.69 (A') | 4.69 (A1) |
| $\delta_{OPA}$  | II        | IO        | OO        |
| S <sub>1</sub>  | 1.11      | 1.24      | 1.38      |
| S <sub>2</sub>  | 0.20      | 0.17      | 0.16      |
| S <sub>3</sub>  | 0.098     | 0.16      | 0.43      |
| S <sub>4</sub>  | 0.15      | 0.19      | 0.013     |
| S <sub>5</sub>  | 0.42      | 0.23      | 0.062     |
| S <sub>6</sub>  | 0.16      | 0.16      | 0.045     |
| S <sub>7</sub>  | 0.72      | 0.57      | 0         |
| S <sub>8</sub>  | 0         | 0         | 0         |
| S <sub>9</sub>  | 0         | 0         | 0.48      |
| S <sub>10</sub> | 0.62      | 0.62      | 0.62      |
| $\mu^2$         | II        | IO        | OO        |
| S <sub>1</sub>  | 11.51     | 12.91     | 14.39     |
| S <sub>2</sub>  | 1.96      | 1.72      | 1.60      |
| S <sub>3</sub>  | 0.97      | 1.55      | 4.23      |
| S <sub>4</sub>  | 1.48      | 1.81      | 0.13      |
| S <sub>5</sub>  | 3.89      | 2.21      | 0.60      |
| S <sub>6</sub>  | 1.48      | 1.42      | 0.41      |
| S <sub>7</sub>  | 6.37      | 5.03      | 0         |
| S <sub>8</sub>  | 0         | 0         | 0         |
| S <sub>9</sub>  | 0         | 0         | 4.22      |
| S <sub>10</sub> | 5.45      | 5.39      | 5.37      |

**Table S5:** H-POCP. Vertical and adiabatic excitation energies  $E$  (hartree), solvent reorganization energy  $\lambda$  (eV), as well as oscillator strength  $\delta_{\text{OPA}}$  (au) for the first six excited states, computed with the state-specific (SS) implementation of PCM at CAM-B3LYP/6-31G(d,p) level in DMF for three carbazole analogue IO, II, OO

| States         | ES (neq)       | ES (eq)        | $\lambda$ (eV) | $\delta_{\text{OPA}}$ (neq) | $\delta_{\text{OPA}}$ (eq) |
|----------------|----------------|----------------|----------------|-----------------------------|----------------------------|
| IO             |                |                |                |                             |                            |
| S <sub>1</sub> | -1952.46908693 | -1952.48350591 | 0.3924         | 0.9009                      | 0.3146                     |
| S <sub>2</sub> | -1952.46832654 | -1952.48351043 | 0.4132         | 0.0849                      | 0.3145                     |
| S <sub>3</sub> | -1952.46142711 | -1952.46492751 | 0.0953         | 0.2648                      | 0.3745                     |
| S <sub>4</sub> | -1952.45625271 | -1952.45695783 | 0.0192         | 0.1494                      | 0.1382                     |
| S <sub>5</sub> | -1952.45437828 | -1952.45552028 | 0.0311         | 0.1432                      | 0.1106                     |
| S <sub>6</sub> | -1952.45187698 | -1952.45496845 | 0.0841         | 0.1302                      | 0.1705                     |
| II             |                |                |                |                             |                            |
| S <sub>1</sub> | -1952.46880593 | -1952.47271717 | 0.1064         | 0.8406                      | 0.6872                     |
| S <sub>2</sub> | -1952.46809242 | -1952.47428660 | 0.1686         | 0.0731                      | 0.0559                     |
| S <sub>3</sub> | -1952.46121259 | -1952.46505528 | 0.1046         | 0.1939                      | 0.2362                     |
| S <sub>4</sub> | -1952.45688896 | -1952.45735588 | 0.0127         | 0.0891                      | 0.094                      |
| S <sub>5</sub> | -1952.45179985 | -1952.45251043 | 0.0193         | 0.2492                      | 0.2289                     |
| S <sub>6</sub> | -1952.45132097 | -1952.45415209 | 0.0770         | 0.1346                      | 0.2215                     |
| OO             |                |                |                |                             |                            |
| S <sub>1</sub> | -1952.46880593 | -1952.47271717 | 0.1064         | 0.9524                      | 0.7270                     |
| S <sub>2</sub> | -1952.46809242 | -1952.47428660 | 0.1686         | 0.0891                      | 0.0863                     |
| S <sub>3</sub> | -1952.46121259 | -1952.46505528 | 0.1046         | 0.5509                      | 0.6844                     |
| S <sub>4</sub> | -1952.45688896 | -1952.45735588 | 0.0127         | 0.0103                      | 0.0164                     |
| S <sub>5</sub> | -1952.45179985 | -1952.45251043 | 0.0193         | 0.0423                      | 0.0345                     |
| S <sub>6</sub> | -1952.45132097 | -1952.45415209 | 0.0770         | 0.0689                      | 0.0857                     |

**Table S6:** H-POCP. Transition dipole derivatives (for transitions  $S_0 \rightarrow S_k$ ,  $k=1-6$ , in atomic units) along the normal modes that result in a large HT contribution to the spectrum intensity. The frequency associated to the normal mode is given in parenthesis. The modes correspond to the diagonalization of the final state (from VH calculations).

| k (freq, cm <sup>-1</sup> ) | $\left(\frac{\partial \mu_x^{if}}{\partial Q_k}\right)$ | $\left(\frac{\partial \mu_y^{if}}{\partial Q_k}\right)$ | $\left(\frac{\partial \mu_z^{if}}{\partial Q_k}\right)$ | Module |
|-----------------------------|---------------------------------------------------------|---------------------------------------------------------|---------------------------------------------------------|--------|
| IO_ $S_0 \rightarrow S_1$   |                                                         |                                                         |                                                         |        |
| 1 (1846i)                   | 1.2361                                                  | -0.9781                                                 | 0.0000                                                  | 1.5763 |
| IO_ $S_0 \rightarrow S_2$   |                                                         |                                                         |                                                         |        |
| 1 (1051i)                   | -1.9556                                                 | -2.0237                                                 | 0.0000                                                  | 2.8142 |
| 175 (2435)                  | -1.6903                                                 | -2.0294                                                 | 0.0000                                                  | 2.6411 |
| IO_ $S_0 \rightarrow S_3$   |                                                         |                                                         |                                                         |        |
| 1 (1119i)                   | 0.3867                                                  | -2.2515                                                 | 0.0000                                                  | 2.2844 |
| 175 (2507)                  | 1.0456                                                  | -0.3812                                                 | 0.0000                                                  | 1.1130 |
| 174 (1943)                  | -0.3147                                                 | -0.9521                                                 | 0.0000                                                  | 1.0027 |
| IO_ $S_0 \rightarrow S_4$   |                                                         |                                                         |                                                         |        |
| 1(671i)                     | -1.8511                                                 | 1.0042                                                  | 0.0000                                                  | 2.1059 |
| 175 (2196)                  | -1.3048                                                 | -0.3255                                                 | 0.0000                                                  | 1.3448 |
| IO_ $S_0 \rightarrow S_5$   |                                                         |                                                         |                                                         |        |
| 174 (2154)                  | -0.6653                                                 | -1.1123                                                 | 0.0000                                                  | 1.2960 |
| 175 (2383)                  | -0.0352                                                 | 0.8184                                                  | 0.0000                                                  | 0.8192 |
| 91 (941)                    | -0.0687                                                 | -0.6537                                                 | 0.0000                                                  | 0.6573 |
| 28 (366)                    | -0.0230                                                 | -0.6307                                                 | 0.0000                                                  | 0.6311 |
| 76 (812)                    | 0.0263                                                  | 0.6275                                                  | 0.0003                                                  | 0.6280 |
| IO_ $S_0 \rightarrow S_6$   |                                                         |                                                         |                                                         |        |
| 1 (48i)                     | 3.1751                                                  | -1.0153                                                 | -0.0001                                                 | 3.3335 |
| 28 (352)                    | 1.2542                                                  | -0.3209                                                 | 0.0000                                                  | 1.2947 |
| 46 (513)                    | 0.8336                                                  | -0.2616                                                 | 0.0000                                                  | 0.8737 |
| 175 (2067)                  | -0.7453                                                 | 0.4473                                                  | 0.0000                                                  | 0.8692 |
| 5 (49)                      | -0.7622                                                 | 0.2610                                                  | 0.0000                                                  | 0.8057 |
| 20 (238)                    | -0.6101                                                 | 0.1922                                                  | 0.0000                                                  | 0.6396 |
| 12 (103)                    | 0.6002                                                  | -0.1668                                                 | 0.0000                                                  | 0.6229 |
| 39 (454)                    | 0.4853                                                  | -0.1947                                                 | 0.0000                                                  | 0.5229 |
| II_ $S_0 \rightarrow S_1$   |                                                         |                                                         |                                                         |        |
| 1 (1985i)                   | 0.0000                                                  | 0.0000                                                  | 1.7589                                                  | 1.7589 |
| II_ $S_0 \rightarrow S_2$   |                                                         |                                                         |                                                         |        |
| 175 (2594)                  | 0.0000                                                  | -2.4845                                                 | 0.0000                                                  | 2.4845 |
| 1 (941i)                    | 0.0000                                                  | -2.1305                                                 | 0.0000                                                  | 2.1305 |
| II_ $S_0 \rightarrow S_3$   |                                                         |                                                         |                                                         |        |
| 1 (3513i)                   | 0.0000                                                  | 0.0000                                                  | -3.5275                                                 | 3.5275 |
| 174 (2023)                  | 0.0000                                                  | 1.1031                                                  | 0.0000                                                  | 1.1031 |
| 175 (2356)                  | 0.0000                                                  | 0.0000                                                  | -1.0653                                                 | 1.0653 |

| II_S <sub>0</sub> →S <sub>4</sub> |          |          |          |        |
|-----------------------------------|----------|----------|----------|--------|
| 196 (4145)                        | 0.0000   | 2.3829   |          | 2.3829 |
| 28 (358)                          | 0.0000   | 0.0000   | - 1.0774 | 1.0774 |
| 46 (506)                          | 0.0001   | 0.0000   | - 0.9222 | 0.9222 |
| 21(241)                           | 0.0000   | 0.0000   | - 0.8346 | 0.8346 |
| 51 (575)                          | 0.0001   | 0.0000   | 0.7785   | 0.7785 |
| 74 (776)                          | 0.0001   | 0.0000   | 0.5476   | 0.5476 |
| II_S <sub>0</sub> →S <sub>5</sub> |          |          |          |        |
| 1 (454i)                          | 0.0000   | -2.4557  | 0.0000   | 2.4557 |
| 174 (1900)                        | 0.0000   | -0.9572  | 0.0000   | 0.9572 |
| 47(532)                           | 0.0000   | -0.9144  | 0.0000   | 0.9144 |
| 69 (746)                          | 0.0000   | -0.6605  | 0.0000   | 0.6605 |
| II_S <sub>0</sub> →S <sub>6</sub> |          |          |          |        |
| 24 (294)                          | 0.0000   | 1.7346   | 0.0000   | 1.7346 |
| 175 (2227)                        | 0.0000   | -1.3373  | 0.0000   | 1.3373 |
| 21 (243)                          | - 0.9630 | 0.0000   | 0.0001   | 0.9630 |
| 51 (563)                          | - 0.8931 | 0.0000   | 0.0001   | 0.8931 |
| 47 (523)                          | - 0.8248 | 0.0000   | 0.0000   | 0.8248 |
| 54 (580)                          | 0.0000   | -0.0002  | - 0.7990 | 0.7990 |
| 23 (271)                          | 0.0000   | - 0.7601 | 0.0000   | 0.7601 |
| 13 (152)                          | 0.0000   | 0.0000   | 0.7001   | 0.7001 |
| 67 (726)                          | 0.0001   | 0.0000   | 0.6392   | 0.6392 |
| 48 (548)                          | 0.0000   | -0.0001  | 0.5851   | 0.5851 |
| 63 (713)                          | 0.0000   | 0.0000   | 0.5380   | 0.5380 |
| OO_S <sub>0</sub> →S <sub>1</sub> |          |          |          |        |
| 1 (1840i)                         | 0.0000   | 0.0000   | -1.4515  | 1.4515 |
| 58 (646)                          | 0.0000   | 0.6109   | 0.0000   | 0.6109 |
| 75 (779)                          | 0.0000   | 0.5765   | 0.0000   | 0.5765 |
| 87 (878)                          | 0.0000   | 0.5723   | 0.0000   | 0.5723 |
| 61 (659)                          | 0.0000   | 0.5246   | 0.0000   | 0.5246 |
| OO_S <sub>0</sub> →S <sub>2</sub> |          |          |          |        |
| 1(960i)                           | 0.0000   | 3.6808   | 0.0000   | 3.6808 |
| 175 (2048)                        | 0.0000   | -3.0225  | 0.0000   | 3.0225 |
| 45 (501)                          | 0.0000   | 0.6720   | 0.0000   | 0.6720 |
| OO_S <sub>0</sub> →S <sub>3</sub> |          |          |          |        |
| 1 (1260i)                         | 0.0000   | 0.0000   | 1.0889   | 1.0889 |
| 174 (2030)                        | 0.0000   | -1.0358  | 0.0000   | 1.0358 |
| 175 (2479)                        | 0.0000   | -0.1729  | 0.0000   | 0.1729 |
| OO_S <sub>0</sub> →S <sub>4</sub> |          |          |          |        |
| 175 (1844)                        | 0.0000   | 1.0564   | 0.0000   | 1.0564 |
| OO_S <sub>0</sub> →S <sub>5</sub> |          |          |          |        |
| 175 (2554)                        | 0.0000   | -1.7001  | 0.0000   | 1.7001 |
| OO_S <sub>0</sub> →S <sub>6</sub> |          |          |          |        |
| 5                                 | 0.0000   | -0.0001  | 3.2694   | 3.2694 |

---

|     |        |         |          |        |
|-----|--------|---------|----------|--------|
| 28  | 0.0000 | 0.0000  | 1.6389   | 1.6389 |
| 4   | 0.0000 | 0.0000  | - 0.9528 | 0.9528 |
| 45  | 0.0000 | 0.0000  | - 0.8080 | 0.8080 |
| 175 | 0.0000 | 0.0000  | 0.7695   | 0.7695 |
| 38  | 0.0000 | 0.0000  | - 0.7670 | 0.7670 |
| 21  | 0.0000 | -0.0001 | - 0.7520 | 0.7520 |
| 42  | 0.0000 | 0.0000  | 0.6046   | 0.6046 |

---

*Note: due to strong Duschinsky mixings, it is not always possible to establish a one-to-one correspondence between these excited-state modes and the ground-state modes shown in Fig. 11.*



**Table S7:** H-POCP. Projection over the transition dipole moments of the transition dipole derivatives (for transitions  $S_0 \rightarrow S_k$ ,  $k=1-6$ ) along the normal modes that result in a large HT contribution to the spectrum intensity for II and OO. The frequency associated to the normal mode is given in parenthesis. For each transition the modes correspond to the diagonalization of the final state Hessian. (highlighted the terms that are connected with the couplings indicated in Table 3, in blue for the state above, and in red with the state below)

| Projection on (II)          |                 |                 |                 |                 |                 |                 |
|-----------------------------|-----------------|-----------------|-----------------|-----------------|-----------------|-----------------|
| K (freq, $\text{cm}^{-1}$ ) | $\mu_{S_0-S_1}$ | $\mu_{S_0-S_2}$ | $\mu_{S_0-S_3}$ | $\mu_{S_0-S_4}$ | $\mu_{S_0-S_5}$ | $\mu_{S_0-S_6}$ |
| $S_0 \rightarrow S_1$       |                 |                 |                 |                 |                 |                 |
| $1_1$ (1985i)               | 0.00            | <b>1.00</b>     | 0.00            | 1.00            | 1.00            | 0.00            |
| $S_0 \rightarrow S_2$       |                 |                 |                 |                 |                 |                 |
| $175_2$ (2594)              | <b>-1.00</b>    | 0.00            | -1.00           | 0.00            | 0.00            | -1.00           |
| $1_2$ (941i)                | -1.00           | 0.00            | <b>-1.00</b>    | 0.00            | 0.00            | -1.00           |
| $S_0 \rightarrow S_3$       |                 |                 |                 |                 |                 |                 |
| $1_3$ (3513i)               | 0.00            | 1.00            | 0.00            | <b>1.00</b>     | 1.00            | 0.00            |
| $174_3$ (2023)              | 1.00            | 0.00            | 1.00            | 0.00            | 0.00            | 1.00            |
| $175_3$ (2356)              | 0.00            | <b>-1.00</b>    | 0.00            | -1.00           | -1.00           | 0.00            |
| $S_0 \rightarrow S_4$       |                 |                 |                 |                 |                 |                 |
| $196_4$ (4145)              | -1.00           | 0.00            | <b>-1.00</b>    | 0.00            | 0.00            | -1.00           |
| $28_4$ (358)                | 0.00            | -1.00           | 0.00            | -1.00           | -1.00           | 0.00            |
| $46_4$ (506)                | 0.00            | 1.00            | 0.00            | 1.00            | 1.00            | 0.00            |
| $S_0 \rightarrow S_5$       |                 |                 |                 |                 |                 |                 |
| $1_5$ (454i)                | -1.00           | 0.00            | -1.00           | 0.00            | 0.00            | <b>-1.00</b>    |
| $174_5$ (1900)              | 1.00            | 0.00            | 1.00            | 0.00            | 0.00            | 1.00            |
| $47_5$ (532)                | 1.00            | 0.00            | 1.00            | 0.00            | 0.00            | 1.00            |
| $S_0 \rightarrow S_6$       |                 |                 |                 |                 |                 |                 |
| $24_6$ (294)                | -1.00           | 0.00            | -1.00           | 0.00            | 0.00            | -1.00           |
| $175_6$ (2226)              | 0.00            | 1.00            | 0.00            | 1.00            | <b>1.00</b>     | 0.00            |
| $21_6$ (243)                | 1.00            | 0.00            | 1.00            | 0.00            | 0.00            | 1.00            |
| Projection on (OO)          |                 |                 |                 |                 |                 |                 |
| K (freq, $\text{cm}^{-1}$ ) | $\mu_{S_0-S_1}$ | $\mu_{S_0-S_2}$ | $\mu_{S_0-S_3}$ | $\mu_{S_0-S_4}$ | $\mu_{S_0-S_5}$ | $\mu_{S_0-S_6}$ |
| $S_0 \rightarrow S_1$       |                 |                 |                 |                 |                 |                 |
| $1_1$ (1840i)               | 0.00            | <b>-1.00</b>    | 0.00            | 1.00            | -1.00           | 0.00            |

| $S_0 \rightarrow S_2$ |             |              |              |      |              |       |
|-----------------------|-------------|--------------|--------------|------|--------------|-------|
| $1_2$ (960i)          | -1.00       | 0.00         | <b>-1.00</b> | 0.00 | 0.00         | -1.00 |
| $175_2$ (2407)        | <b>1.00</b> | 0.00         | 1.00         | 0.00 | 0.00         | 1.00  |
| $S_0 \rightarrow S_3$ |             |              |              |      |              |       |
| $1_3$ (1260i)         | 0.00        | -1.00        | 0.00         | 1.00 | <b>-1.00</b> | 0.00  |
| $174_3$ (2030)        | 1.00        | 0.00         | 1.00         | 0.00 | 0.00         | 1.00  |
| $175_3$ (2479)        | 0.00        | <b>-1.00</b> | 0.00         | 1.00 | -1.00        | 0.00  |
| $S_0 \rightarrow S_4$ |             |              |              |      |              |       |
| $175_4$ (1844)        | -1.00       | 0.00         | -1.00        | 0.00 | 0.00         | -1.00 |
| $S_0 \rightarrow S_5$ |             |              |              |      |              |       |
| $175_5$ (2554)        | 1.00        | 0.00         | <b>1.00</b>  | 0.00 | 0.00         | 1.00  |
| $S_0 \rightarrow S_6$ |             |              |              |      |              |       |
| $5_6$ (83)            | -1.00       | 0.00         | -1.00        | 0.00 | 0.00         | -1.00 |
| $28_6$ (396)          | 0.00        | 1.00         | 0.00         | 1.00 | 1.00         | 0.00  |
| $4_6$ (51)            | 1.00        | 0.00         | 1.00         | 0.00 | 0.00         | 1.00  |
